# Supplementary material
Source: publisher site journal article supplement (https://www.dovepress.com/article/178151)
Supplement: Supplementary file 1 [file get_supplementary_file.php]

## Supplementary materials

**Table S1** Base sequence of primers used in this study.

| Name                      | Base sequence                   |
|---------------------------|---------------------------------|
| miR-593-5p forward primer | 5'- CACCAGCCAGGCATTGCTC -3'     |
| miR-593-5p reverse primer | 5'-CTCAACTGGTGTCTGTTGA-3'       |
| U6 forward primer         | 5'-TTATGGGTCCTAGCCTGAC-3'       |
| U6 forward primer         | 5'-CACTATTGCGGGTCTGC-3'         |
| MST4 forward primer       | 5'-TCACATTTGAGACCCTGTGTTTG-3'   |
| MST4 reverse primer       | 5'-ACCTATCCTTGGGTAAATGATCTTG-3' |
| PPM1A forward primer      | 5'-GGAAGAATTATCTTCGTCGAC-3'     |
| PPM1A reverse primer      | 5'-GGACGAACCCCGAAGGACCC-3'      |
| TWSG1 forward primer      | 5'-CGAGTGGGGACATTAGG-3'         |
| TWSG1 reverse primer      | 5'-GCTGTCTCGCTCTGTTGC-3'        |
| GAPDH forward primer      | 5'-GCACCGTCAAGGCTGAGAAC-3'      |
| GAPDH reverse primer      | 5'-TGGTGAAGACGCCAGTGGA-3'       |
